# Supplementary material for: Broad-spectrum activity of bulevirtide against clinical isolates of HDV and recombinant pan-genotypic combinations of HBV/HDV
Source: PubMed Central journal article supplement (PMC10622701; doi:10.1016/j.jhepr.2023.100893), 2023-08-22
Supplement: mmc1.pdf [file mmc1.pdf]

# **Broad-spectrum activity of bulevirtide against clinical isolates of HDV and recombinant pan-genotypic combinations of HBV/HDV**

Roberto Mateo, Simin Xu, Alex Shornikov, Tahmineh Yazdi, Yang Liu, Lindsey May, Bin Han, Dong Han, Ross Martin, Savrina Manhas, Christopher Richards, Caleb Marceau, Thomas Aeschbacher, Silvia Chang, Dmitry Manuilov, Julius Hollnberger, Stephan Urban, Tarik Asselah, Dzhamal Abdurakhmanov, Pietro Lampertico, Evguenia Maiorova, Hongmei Mo

## Table of contents

|               |   |
|---------------|---|
| Table S1..... | 2 |
| Table S2..... | 3 |
| Table S3..... | 4 |
| Table S4..... | 6 |

**Table S1. Percentage of HDAg-positive PHH cells after infection with HDV-1-8 enveloped with L-HBsAg from HBV GTA-H**

| HBV GT     | BLV EC <sub>50</sub> (nM) |             |              |             |                    |                    |              |              | HBV mean | HBV median |
|------------|---------------------------|-------------|--------------|-------------|--------------------|--------------------|--------------|--------------|----------|------------|
|            | HDV-1                     | HDV-2       | HDV-3        | HDV-4       | HDV-5              | HDV-6              | HDV-7        | HDV-8        |          |            |
| GTA        | 0.21 ± 0.03               | 0.17 ± 0.04 | 0.66 ± 0.33  | 0#          | 2.55 ± 0.07        | 4.19 ± 0.30        | 0.95 ± 0.38  | 3.75 ± 0.07  | 1.56     | 0.81       |
| GTB        | 18 ± 5.63                 | 8.27 ± 0.29 | 10.77 ± 3.60 | 2.27 ± 0.48 | 6.91 ± 0.21        | 9.84 ± 0.44        | 5.54 ± 0.25  | 4.38 ± 0.06  | 8.36     | 7.59       |
| GTC        | 0.77 ± 0.14               | 0.39 ± 0.07 | 0.08 ± 0.04  | 0.02 ± 0.01 | 2.55 ± 0.28        | 0.54 ± 0.17        | 0.21 ± 0.04  | 3.20 ± 0.09  | 0.97     | 0.47       |
| GTD        | 10.1 ± 5.54               | 0.53 ± 0.03 | 12.40 ± 2.27 | 0.05 ± 0.0  | 1.45 ± 0.27        | 2.07 ± 0.35        | 0.30 ± 0.03  | 1.94 ± 0.10  | 3.60     | 1.70       |
| GTE        | 2.76 ± 0.27               | 6.60 ± 0.57 | 6.96 ± 1.60  | 0.47 ± 0.01 | 34.42 <sup>a</sup> | 24.77 <sup>a</sup> | 25.14 ± 3.68 | 11.36 ± 1.25 | 14.06    | 9.16       |
| GTF        | 1.19 ± 0.43               | 0.02 ± 0.01 | 1.96 ± 0.33  | 0           | 0.38 ± 0.16        | 0                  | 0.08 ± 0.02  | 4.09 ± 0.23  | 1.29     | 0.79       |
| GTG        | 13.3 ± 4.68               | 0.86 ± 0.11 | 6.40 ± 0.41  | 0.36 ± 0.14 | 24.94 <sup>a</sup> | 3.88 ± 1.16        | 12.85 ± 4.53 | 4.00 ± 0.08  | 8.32     | 5.20       |
| GTH        | 1.57 ± 0.47               | 0.08 ± 0.04 | 5.40 ± 0.40  | 0           | 0.52 ± 0.13        | 0                  | 0.03 ± 0.01  | 3.53 ± 0.03  | 1.39     | 0.30       |
| HDV mean   | 6.09                      | 2.12        | 5.58         | 0.45        | 9.21               | 6.47               | 5.64         | 4.53         |          |            |
| HDV median | 2.16                      | 0.46        | 5.90         | 0.05        | 2.55               | 3.88               | 0.63         | 3.88         |          |            |

<sup>a</sup> Assay used 40 µl of input viral inoculum (N=1)



**Table S3. Sequence alignment of BLV sequence with the most common clinical isolates of HBV genotypes A-D**

| Position             | Average EC50 (nM) <sup>a</sup> | 15  | 20    | 25    | 30    | 35                  | 40              | 45                     | 50    | 55           |         |
|----------------------|--------------------------------|-----|-------|-------|-------|---------------------|-----------------|------------------------|-------|--------------|---------|
| BLV Sequence         | -                              | GTN | LSVPN | PLGFF | PDHQL | DPAFG               | ANSNN           | PDWDF                  | NPNKD | HWPEA        | NKVG    |
| <b>GTA Consensus</b> | 0.65 <sup>b</sup>              | .   | .     | .     | .     | .                   | .               | .                      | I     | .            | A . Q . |
| HBVA.1-HDV1          | 0.17                           | .   | A .   | .     | .     | L . R .             | .               | .                      | V .   | .            | Q . Q . |
| HBVA.2-HDV1          | 0.88                           | .   | .     | .     | .     | .                   | .               | .                      | I     | .            | Q . Q . |
| <b>GTB Consensus</b> | 0.90 <sup>b</sup>              | .   | .     | .     | .     | K . . E . . . .     | .               | L . H . N . D . . . .  | .     | .            | .       |
| HBVB.1-HDV1          | 0.47                           | .   | A .   | .     | .     | L . R . . E . . . . | .               | L . H . N . D . . . .  | .     | .            | .       |
| HBVB.2-HDV1          | 0.74                           | .   | .     | .     | L .   | .                   | K . . D . . . . | L . H . T . DS . . . . | .     | .            | .       |
| HBVB.3-HDV1          | 0.55                           | .   | .     | .     | L .   | .                   | K . . D . . . . | L . H . N . D . . . .  | .     | .            | .       |
| HBVB.4-HDV1          | 0.42                           | .   | .     | .     | .     | .                   | K . . D . . . . | L . H . Y . DS . . . . | .     | .            | .       |
| HBVB.5-HDV1          | 0.41                           | .   | .     | .     | .     | .                   | K . . E . . . . | QH . N . D . . . .     | .     | .            | .       |
| HBVB.6-HDV1          | 0.93                           | .   | .     | .     | .     | .                   | K . . E . . . . | L . Y . N . D . . . .  | .     | .            | .       |
| HBVB.7-HDV1          | 0.67                           | .   | .     | .     | .     | .                   | K . . E . . . . | L . Y . N . D . . . .  | .     | .            | .       |
| HBVB.8-HDV1          | n/a                            | .   | .     | .     | .     | .                   | K . . E . . . . | L . H . T . D . . . .  | .     | .            | .       |
| HBVB.9-HDV1          | 0.68                           | .   | .     | .     | .     | .                   | K . . E . . . . | L . Y . N . D . . . .  | .     | .            | .       |
| HBVB.10-HDV1         | 0.43                           | .   | .     | .     | .     | .                   | K . . E . . . . | L . H . N . N . . . .  | .     | .            | .       |
| <b>GTC Consensus</b> | 0.46 <sup>a</sup>              | .   | .     | .     | .     | .                   | .               | .                      | .     | .            | Q .     |
| HBVC.1-HDV1          | 0.47                           | .   | A .   | .     | .     | L . R .             | .               | .                      | .     | P . . . .    | Q .     |
| HBVC.2-HDV1          | 0.21                           | .   | A .   | .     | .     | L . R .             | .               | .                      | .     | P . . . .    | HQ .    |
| HBVC.3-HDV1          | 0.71                           | .   | .     | .     | L .   | .                   | .               | .                      | .     | .            | Q .     |
| HBVC.4-HDV1          | 0.24                           | .   | A .   | .     | .     | L . R .             | .               | .                      | .     | P . . . .    | Q .     |
| HBVC.5-HDV1          | 0.45                           | .   | .     | .     | .     | G . . . .           | R . . . .       | .                      | .     | Q . A . Q .  | .       |
| HBVC.6-HDV1          | 0.28                           | .   | .     | .     | G .   | .                   | .               | L . . . .              | .     | Q . A . HQ . | .       |
| HBVC.7-HDV1          | 0.88                           | .   | .     | .     | L .   | .                   | .               | .                      | .     | P . . . .    | WQ .    |
| HBVC.8-HDV1          | 0.29                           | .   | .     | .     | G .   | .                   | .               | .                      | .     | Q . A . Q .  | .       |
| HBVC.9-HDV1          | n/a                            | .   | .     | .     | .     | .                   | .               | .                      | .     | Q . . . .    | Q .     |

|                          |                   |                                              |
|--------------------------|-------------------|----------------------------------------------|
| <b>HBVC.10-<br/>HDV1</b> | 0.26              | ..... G. .... Q. . A. . Q. .                 |
| <b>GTD<br/>Consensus</b> | 0.49 <sup>a</sup> | Q. . . TS. .... R . . TA. .... T . . D. .... |
| <b>HBVD.1-<br/>HDV1</b>  | 0.29              | Q. . . TS. .... K . . TA. .... P . . D. .... |
| <b>HBVD.2-<br/>HDV1</b>  | 0.2               | Q. . . TS. .... R . . TA. .... T . . N. .... |

<sup>a</sup> Average of two replicate values is shown (N=2)

<sup>b</sup> EC<sub>50</sub> for representative sequences for HBV genotypes A-D were measured as described in Table 1

n/a: EC<sub>50</sub> values not available

**Table S4. Subject clinical, virological and biochemical information for baseline plasma samples from participants described in this study**

| Subject ID | Country <sup>a</sup> | HBV GT | HDV GT | Log10 HDV RNA [IU/mL] | HBV DNA [IU/mL] | Log10 HBsAg [IU/mL] | EC <sub>50</sub> | ALT [U/mL] |
|------------|----------------------|--------|--------|-----------------------|-----------------|---------------------|------------------|------------|
| 1          | RUS                  | D      | 1      | 4.81                  | <10             | 3.18                | 0.37             | ND         |
| 2          | RUS                  | D      | 1      | 4.74                  | <10             | 3.52                | 0.22             | ND         |
| 3          | RUS                  | D      | 1      | 7.01                  | 22              | 3.08                | 0.69             | ND         |
| 4          | RUS                  | D      | 1      | 5.21                  | 15              | 3.92                | 0.26             | ND         |
| 5          | RUS                  | D      | 1      | 6.53                  | 26              | 3.88                | 0.25             | ND         |
| 6          | RUS                  | D      | 1      | 6.64                  | 10              | 4.08                | 0.16             | ND         |
| 7          | RUS                  | A      | 1      | 6.52                  | 522             | 3.73                | 0.57             | ND         |
| 8          | RUS                  | D      | 1      | 7.01                  | 60              | 4.23                | 0.68             | ND         |
| 9          | RUS                  | D      | 1      | 6.21                  | 22              | 3.40                | 0.19             | ND         |
| 10         | RUS                  | D      | 1      | 4.01                  | <10             | 2.85                | 0.23             | 439        |
| 11         | FRA                  | A      | 1      | 5.23                  | 20              | 3.96                | 0.77             | ND         |
| 12         | FRA                  | E      | 5      | 5.85                  | 768             | 4.18                | 0.35             | ND         |
| 13         | FRA                  | A      | 6      | 4.13                  | 16              | 3.45                | 0.70             | 59         |
| 14         | FRA                  | E      | 5      | 6.37                  | ND              | 3.79                | 0.72             | 76         |
| 15         | RUS                  | D      | 1      | 3.75                  | 14              | 3.91                | 0.40             | 81         |
| 16         | RUS                  | D      | 1      | 4.49                  | 71              | 4.00                | 0.41             | 113        |
| 17         | RUS                  | D      | 1      | 5.04                  | 19              | 3.76                | 0.24             | 302        |
| 18         | RUS                  | D      | 1      | 6.55                  | 13              | 4.48                | 0.27             | 104        |
| 19         | RUS                  | D      | 1      | 7.46                  | 11              | 4.15                | 1.27             | 94         |
| 20         | RUS                  | D      | 1      | 5.69                  | 12              | 3.76                | 0.67             | 42         |
| 21         | RUS                  | D      | 1      | 4.56                  | 12              | 3.83                | 0.47             | 45         |
| 22         | RUS                  | D      | 1      | 7.06                  | 172             | 4.18                | 0.88             | 70         |
| 23         | RUS                  | D      | 1      | 4.92                  | <10             | 2.49                | 0.29             | 335        |
| 24         | RUS                  | D      | 1      | 4.15                  | <10             | 3.91                | 0.47             | 49         |
| 25         | RUS                  | D      | 1      | 6.52                  | 28              | 4.23                | 0.27             | 95         |
| 26         | RUS                  | D      | 1      | 3.78                  | 66              | 3.76                | 0.24             | ND         |
| 27         | RUS                  | D      | 1      | 6.03                  | 93              | ND                  | 0.87             | ND         |
| 28         | RUS                  | D      | 1      | 4.83                  | 21              | 3.77                | 0.50             | 82         |
| 29         | RUS                  | D      | 1      | 6.49                  | 16              | 2.70                | 0.31             | 133        |
| 30         | RUS                  | D      | 1      | 4.83                  | 10              | 3.66                | 0.43             | 36         |
| 31         | RUS                  | D      | 1      | 5.56                  | 185             | 3.32                | 0.42             | 82         |
| 32         | RUS                  | D      | 1      | 4.97                  | 43333           | 3.90                | 0.39             | 193        |
| 33         | RUS                  | D      | 1      | 4.61                  | <10             | 3.75                | 0.51             | 91         |
| 34         | RUS                  | D      | 1      | 7.49                  | 22              | 4.30                | 0.43             | 285        |
| 35         | RUS                  | D      | 1      | 4.79                  | 12              | 3.95                | 0.32             | 40         |
| 36         | RUS                  | D      | 1      | 3.86                  | 10              | 2.54                | 0.34             | 64         |
| 37         | RUS                  | D      | 1      | 5.27                  | <10             | 3.57                | 0.80             | 39         |
| 38         | RUS                  | D      | 1      | 3.90                  | 57              | 3.69                | 0.22             | 212        |
| 39         | RUS                  | D      | 1      | 5.58                  | 3318            | 4.46                | 0.32             | 123        |

|    |     |   |   |      |         |      |      |     |
|----|-----|---|---|------|---------|------|------|-----|
| 40 | RUS | D | 1 | 5.50 | 39      | 4.18 | 0.26 | 145 |
| 41 | RUS | D | 1 | 6.05 | 148     | 4.43 | 0.28 | 273 |
| 42 | RUS | D | 1 | 3.84 | 11      | 3.04 | 0.49 | 273 |
| 43 | RUS | D | 1 | 5.40 | <10     | 4.11 | 0.20 | 107 |
| 44 | RUS | D | 1 | 4.01 | <10     | 4.11 | 0.42 | ND  |
| 45 | RUS | D | 1 | 5.38 | 317     | 3.36 | 0.39 | ND  |
| 46 | RUS | D | 1 | 5.28 | 13      | 3.30 | 0.43 | 73  |
| 47 | RUS | D | 1 | 5.16 | <10     | 3.94 | 0.25 | 125 |
| 48 | RUS | D | 1 | 6.08 | 418     | 4.28 | 0.35 | 54  |
| 49 | RUS | D | 1 | 7.04 | 3343101 | 3.99 | 1.27 | 210 |
| 50 | RUS | D | 1 | 4.39 | 26      | 3.58 | 0.30 | 38  |
| 51 | RUS | D | 1 | 6.06 | 125     | 4.15 | 0.31 | 141 |
| 52 | RUS | D | 1 | 6.12 | 101     | 4.20 | 0.23 | 101 |
| 53 | RUS | D | 1 | 5.63 | 17      | 3.91 | 0.28 | 97  |
| 54 | RUS | D | 1 | 6.19 | 152     | 3.59 | 0.45 | 130 |
| 55 | RUS | D | 1 | 2.27 | 6840    | 3.61 | 0.79 | 51  |
| 56 | RUS | D | 1 | 3.54 | <10     | 3.69 | 0.26 | 84  |
| 57 | RUS | D | 1 | 7.11 | <10     | 3.65 | 0.58 | 88  |
| 58 | RUS | D | 1 | 5.22 | 11      | 3.65 | 0.24 | 103 |
| 59 | RUS | D | 1 | 6.08 | 454     | 3.73 | 0.25 | 54  |
| 60 | RUS | D | 1 | 2.68 | 81      | 3.48 | 0.55 | 64  |
| 61 | RUS | D | 1 | 5.02 | <10     | 4.23 | 0.09 | 101 |
| 62 | RUS | D | 1 | 5.16 | <10     | 4.00 | 0.53 | 57  |
| 63 | RUS | D | 1 | 5.75 | <10     | 3.92 | 0.29 | 80  |
| 64 | RUS | D | 1 | 6.12 | <10     | 3.69 | 0.34 | 52  |
| 65 | RUS | D | 1 | 6.36 | 274     | 3.65 | 0.49 | 184 |
| 66 | RUS | D | 1 | 6.61 | 22      | 4.30 | 0.29 | ND  |
| 67 | RUS | D | 1 | 5.04 | 14      | 3.89 | 0.28 | 25  |
| 68 | RUS | D | 1 | 4.46 | 12      | 3.59 | 0.31 | 40  |
| 69 | RUS | A | 1 | 6.14 | <10     | 3.26 | 0.38 | 239 |
| 70 | RUS | D | 1 | 5.81 | 737     | 3.93 | 0.51 | ND  |
| 71 | RUS | D | 1 | 5.62 | 16      | 3.99 | 0.30 | ND  |
| 72 | RUS | D | 1 | 4.89 | <10     | 2.74 | 0.24 | 136 |
| 73 | RUS | D | 1 | 4.81 | 2152113 | 4.36 | 0.41 | ND  |
| 74 | RUS | D | 1 | 5.52 | <10     | 3.54 | 0.25 | 76  |
| 75 | RUS | D | 1 | 4.08 | 56      | 3.82 | 0.40 | 43  |
| 76 | RUS | D | 1 | 4.34 | 16      | 3.67 | 0.25 | ND  |
| 77 | RUS | D | 1 | 5.11 | 54      | 4.00 | 0.22 | ND  |
| 78 | RUS | D | 1 | 5.23 | <10     | 4.43 | 0.18 | 77  |
| 79 | RUS | D | 1 | 4.82 | 17      | 3.64 | 0.28 | ND  |
| 80 | DEU | A | 1 | 5.65 | 20      | 3.34 | 0.50 | 120 |
| 81 | DEU | D | 1 | 4.52 | <10     | 3.23 | 0.32 | 55  |
| 82 | DEU | D | 1 | 6.02 | 23      | 4.26 | 0.26 | 74  |
| 83 | DEU | D | 1 | 5.52 | <10     | 3.87 | 0.16 | 77  |
| 84 | DEU | D | 1 | 4.44 | 518     | 4.28 | 0.21 | 114 |
| 85 | DEU | D | 1 | 5.44 | <10     | 2.92 | 0.20 | 254 |
| 86 | DEU | D | 1 | 5.39 | 23      | 4.08 | 0.19 | 74  |
| 87 | DEU | D | 1 | 4.49 | <10     | 3.95 | 0.16 | 74  |

|     |     |   |   |      |       |      |      |     |
|-----|-----|---|---|------|-------|------|------|-----|
| 88  | DEU | D | 1 | 5.74 | <10   | 4.15 | 0.20 | 197 |
| 89  | DEU | D | 1 | 6.83 | <10   | 4.04 | 0.74 | 63  |
| 90  | DEU | D | 1 | 3.60 | 11    | 3.18 | 0.24 | 124 |
| 91  | DEU | D | 1 | 5.01 | 21    | 3.95 | 0.23 | 113 |
| 92  | DEU | D | 1 | 3.49 | <10   | ND   | 0.30 | ND  |
| 93  | DEU | D | 1 | 6.32 | 166   | ND   | 0.35 | ND  |
| 94  | DEU | D | 1 | 4.30 | <10   | 2.89 | 0.65 | 289 |
| 95  | DEU | D | 1 | 5.78 | 42    | 4.20 | 0.52 | 247 |
| 96  | DEU | E | 5 | 4.54 | 27    | 3.83 | 0.36 | ND  |
| 97  | DEU | D | 1 | 4.54 | <10   | 2.32 | 0.29 | 128 |
| 98  | DEU | D | 1 | 5.33 | <10   | 2.76 | 0.25 | 266 |
| 99  | ITA | D | 1 | 3.61 | 170   | 2.34 | 0.35 | 63  |
| 100 | ITA | D | 1 | 5.22 | 23    | 3.56 | 0.22 | 57  |
| 101 | ITA | D | 1 | 5.22 | 18    | 3.30 | 0.39 | 90  |
| 102 | ITA | D | 1 | 7.00 | 13    | 3.36 | 0.80 | 102 |
| 103 | ITA | D | 1 | 5.84 | <10   | 3.80 | 0.23 | 65  |
| 104 | ITA | D | 1 | 5.38 | 10    | 4.00 | 0.43 | 59  |
| 105 | ITA | D | 1 | 6.41 | 14    | 4.11 | 0.33 | 131 |
| 106 | ITA | D | 1 | 5.41 | <10   | 3.18 | 0.39 | 191 |
| 107 | ITA | D | 1 | 5.46 | 12    | 4.04 | 0.52 | 36  |
| 108 | ITA | D | 1 | 7.21 | 35    | 4.20 | 1.08 | 245 |
| 109 | ITA | D | 1 | 6.21 | <10   | 3.91 | 0.47 | 146 |
| 110 | ITA | D | 1 | 3.73 | <10   | 3.51 | 0.33 | 116 |
| 111 | ITA | D | 1 | 3.26 | <10   | 3.79 | 0.22 | 76  |
| 112 | ITA | D | 1 | 5.93 | <10   | 3.69 | 0.36 | 161 |
| 113 | ITA | D | 1 | 4.28 | <10   | 3.83 | 0.30 | 39  |
| 114 | ITA | D | 1 | 4.75 | 61    | 3.65 | 0.41 | ND  |
| 115 | SWE | A | 1 | 4.48 | 42    | 3.49 | 0.50 | ND  |
| 116 | CIV | A | 1 | ND   | ND    | ND   | 0.29 | 144 |
| 117 | CIV | A | 5 | ND   | <10   | ND   | 0.23 | 36  |
| 118 | CIV | E | 5 | ND   | 490   | ND   | 0.55 | 42  |
| 119 | MDA | A | 1 | ND   | <10   | ND   | 0.18 | 206 |
| 120 | RUS | D | 1 | ND   | <10   | ND   | 0.10 | 19  |
| 121 | CMR | E | 1 | ND   | 15100 | ND   | 0.79 | 72  |
| 122 | ROU | A | 1 | ND   | ND    | ND   | 0.41 | 226 |
| 123 | RUS | D | 2 | ND   | ND    | ND   | 0.24 | ND  |
| 124 | RUS | A | 1 | ND   | ND    | ND   | 0.27 | ND  |
| 125 | FRA | C | 1 | ND   | <20   | ND   | 0.13 | 60  |
| 126 | FRA | E | 1 | ND   | 27    | ND   | 0.66 | 35  |
| 127 | ITA | B | 1 | ND   | ND    | ND   | 0.45 | ND  |
| 128 | ITA | A | 1 | ND   | ND    | ND   | 0.82 | ND  |

<sup>a</sup> RUS = Russia; FRA = France; DEU = Germany; ITA = Italy; SWE = Sweden; CIV = Cote D'Ivoire; MDA = Moldova; CMR = Cameroon; ROU = Romania
